# Supplementary material for: MicroSEC filters sequence errors for formalin-fixed and paraffin-embedded samples
Source: PubMed Central journal article supplement (PMC8674242; doi:10.1038/s42003-021-02930-4), 2021-12-15
Supplement: 42003_2021_2930_MOESM2_ESM.pdf [file 42003_2021_2930_MOESM2_ESM.pdf]

## Supplementary Information

### MicroSEC filters sequence errors for formalin-fixed and paraffin-embedded samples

Masachika Ikegami<sup>1,2,3,\*</sup>, Shinji Kohsaka<sup>1,\*</sup>, Takeshi Hirose<sup>1,4</sup>, Toshihide Ueno<sup>1</sup>, Satoshi Inoue<sup>1</sup>, Naoki Kanomata<sup>5</sup>, Hideko Yamauchi<sup>6</sup>, Taisuke Mori<sup>7</sup>, Shigeki Sekine<sup>7</sup>, Yoshihiro Inamoto<sup>8</sup>, Yasushi Yatabe<sup>7,9</sup>, Hiroshi Kobayashi<sup>2</sup>, Sakae Tanaka<sup>2</sup>, and Hiroyuki Mano<sup>1,\*</sup>

<sup>1</sup>Division of Cellular Signaling, National Cancer Center Research Institute, Tokyo, Japan

<sup>2</sup>Department of Orthopaedic Surgery, Faculty of Medicine, The University of Tokyo, Tokyo, Japan

<sup>3</sup>Department of Musculoskeletal Oncology, Tokyo Metropolitan Cancer and Infectious Diseases Center Komagome Hospital, Tokyo, Japan

<sup>4</sup>Department of Orthopaedic Surgery, Graduate School of Medical Sciences, Kyushu University, Fukuoka, Japan

<sup>5</sup>Department of Pathology, St Luke's International Hospital, Tokyo, Japan

<sup>6</sup>Department of Breast Surgical Oncology, St Luke's International Hospital, Tokyo, Japan

<sup>7</sup>Division of Molecular Pathology, National Cancer Center Research Institute, Tokyo, Japan

<sup>8</sup>Department of Hematopoietic Stem Cell Transplantation, National Cancer Center Hospital, Tokyo, Japan

<sup>9</sup>Department of Biobank and Tissue Resources, National Cancer Center Research Institute, Tokyo, Japan

\*Correspondence should be addressed to: Masachika Ikegami ([ikegami-tky@umin.ac.jp](mailto:ikegami-tky@umin.ac.jp)), Shinji Kohsaka ([skohsaka@ncc.go.jp](mailto:skohsaka@ncc.go.jp)), or Hiroyuki Mano ([hmano@ncc.go.jp](mailto:hmano@ncc.go.jp)).

### **Contents**

Supplementary figures 1–5

Supplementary tables 1–3

**Supplementary Figure 1. The distribution of the variant allele frequencies of the breast tissue samples.**

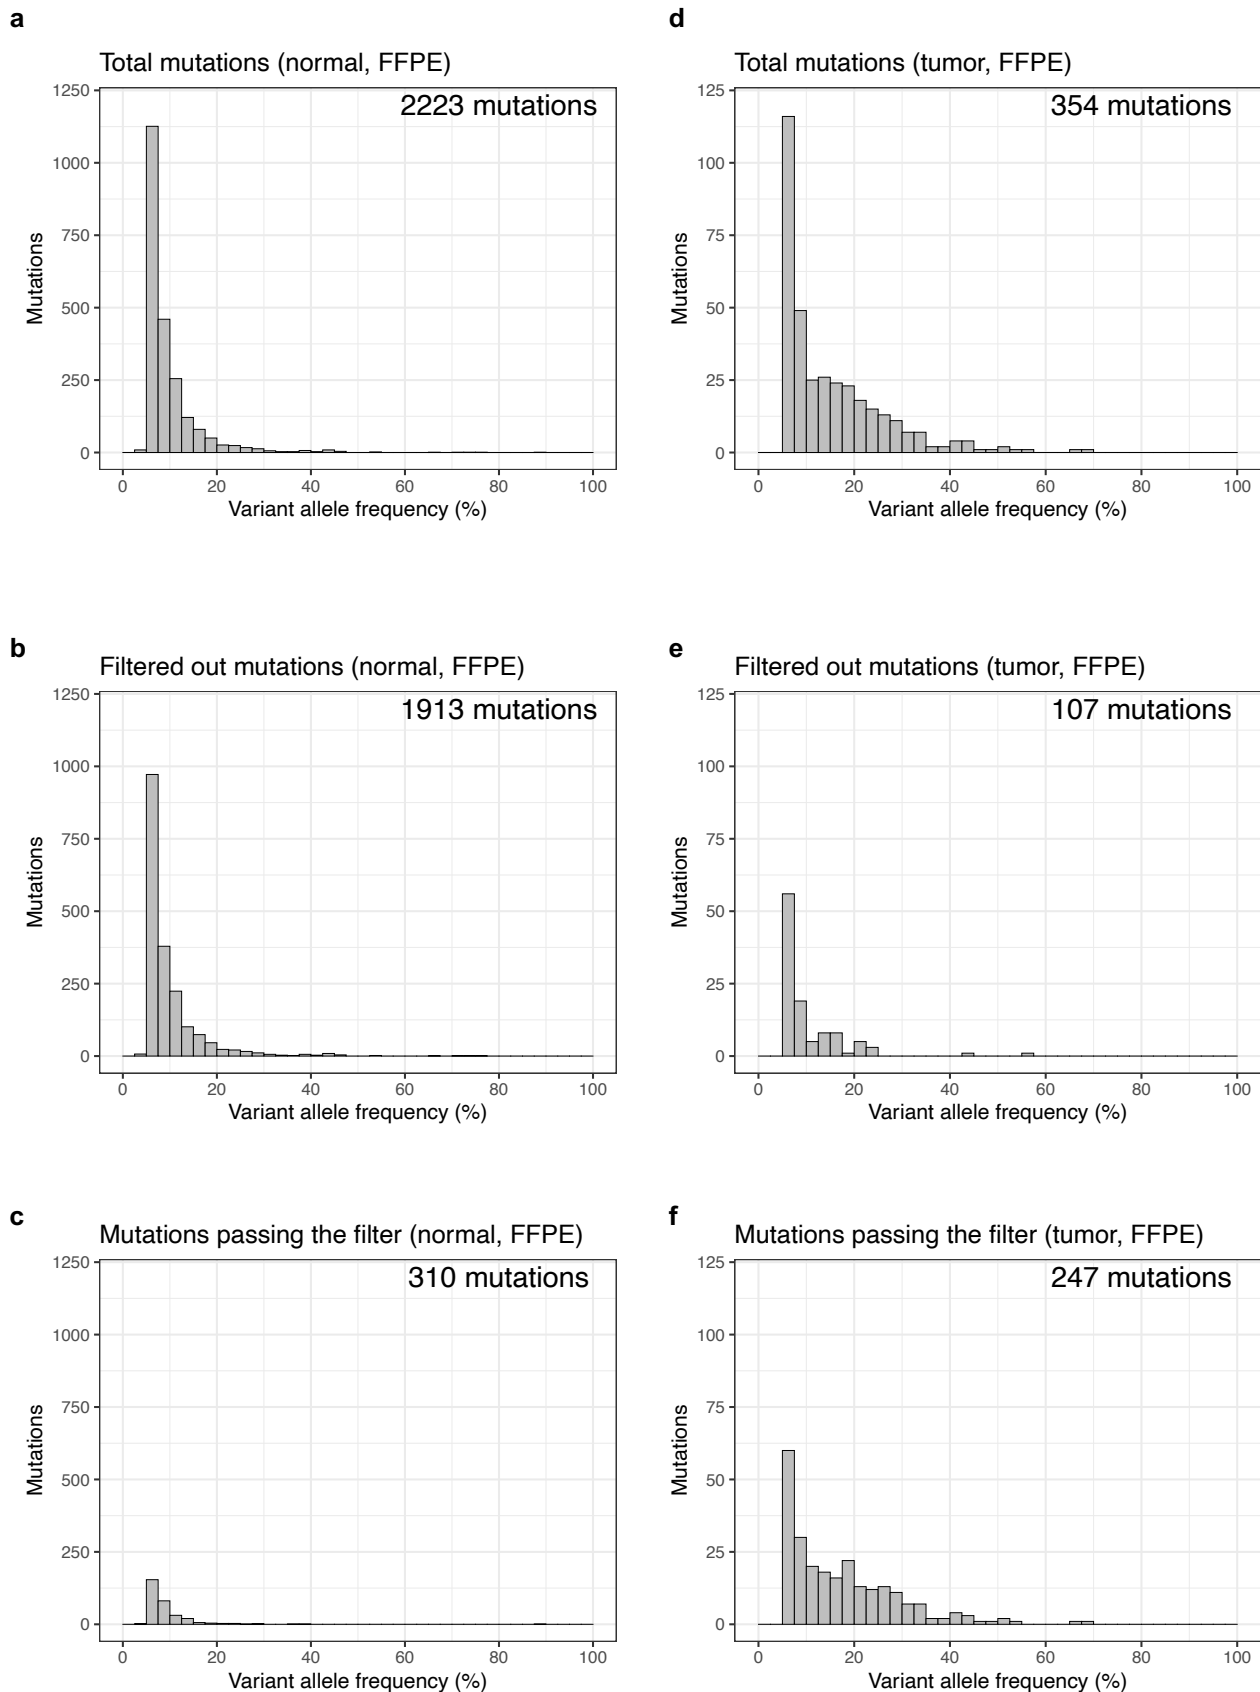

**a–c** FFPE samples of normal breast tissues (n = 190) with total somatic mutations (**a**), mutations filtered out by MicroSEC filter (**b**), and mutations passing through the filter (**c**).

**d–f** FFPE samples of breast tumor tissues (n = 33) with total somatic mutations (**d**), mutations filtered out by MicroSEC filter (**e**), and mutations passed through the filter (**f**). The somatic mutations shown represent those present in normal breast tissue but not in normal blood. FFPE, formalin-fixed and paraffin-embedded.

**Supplementary Figure 2. The distribution of the mutations in breast tissue samples.**

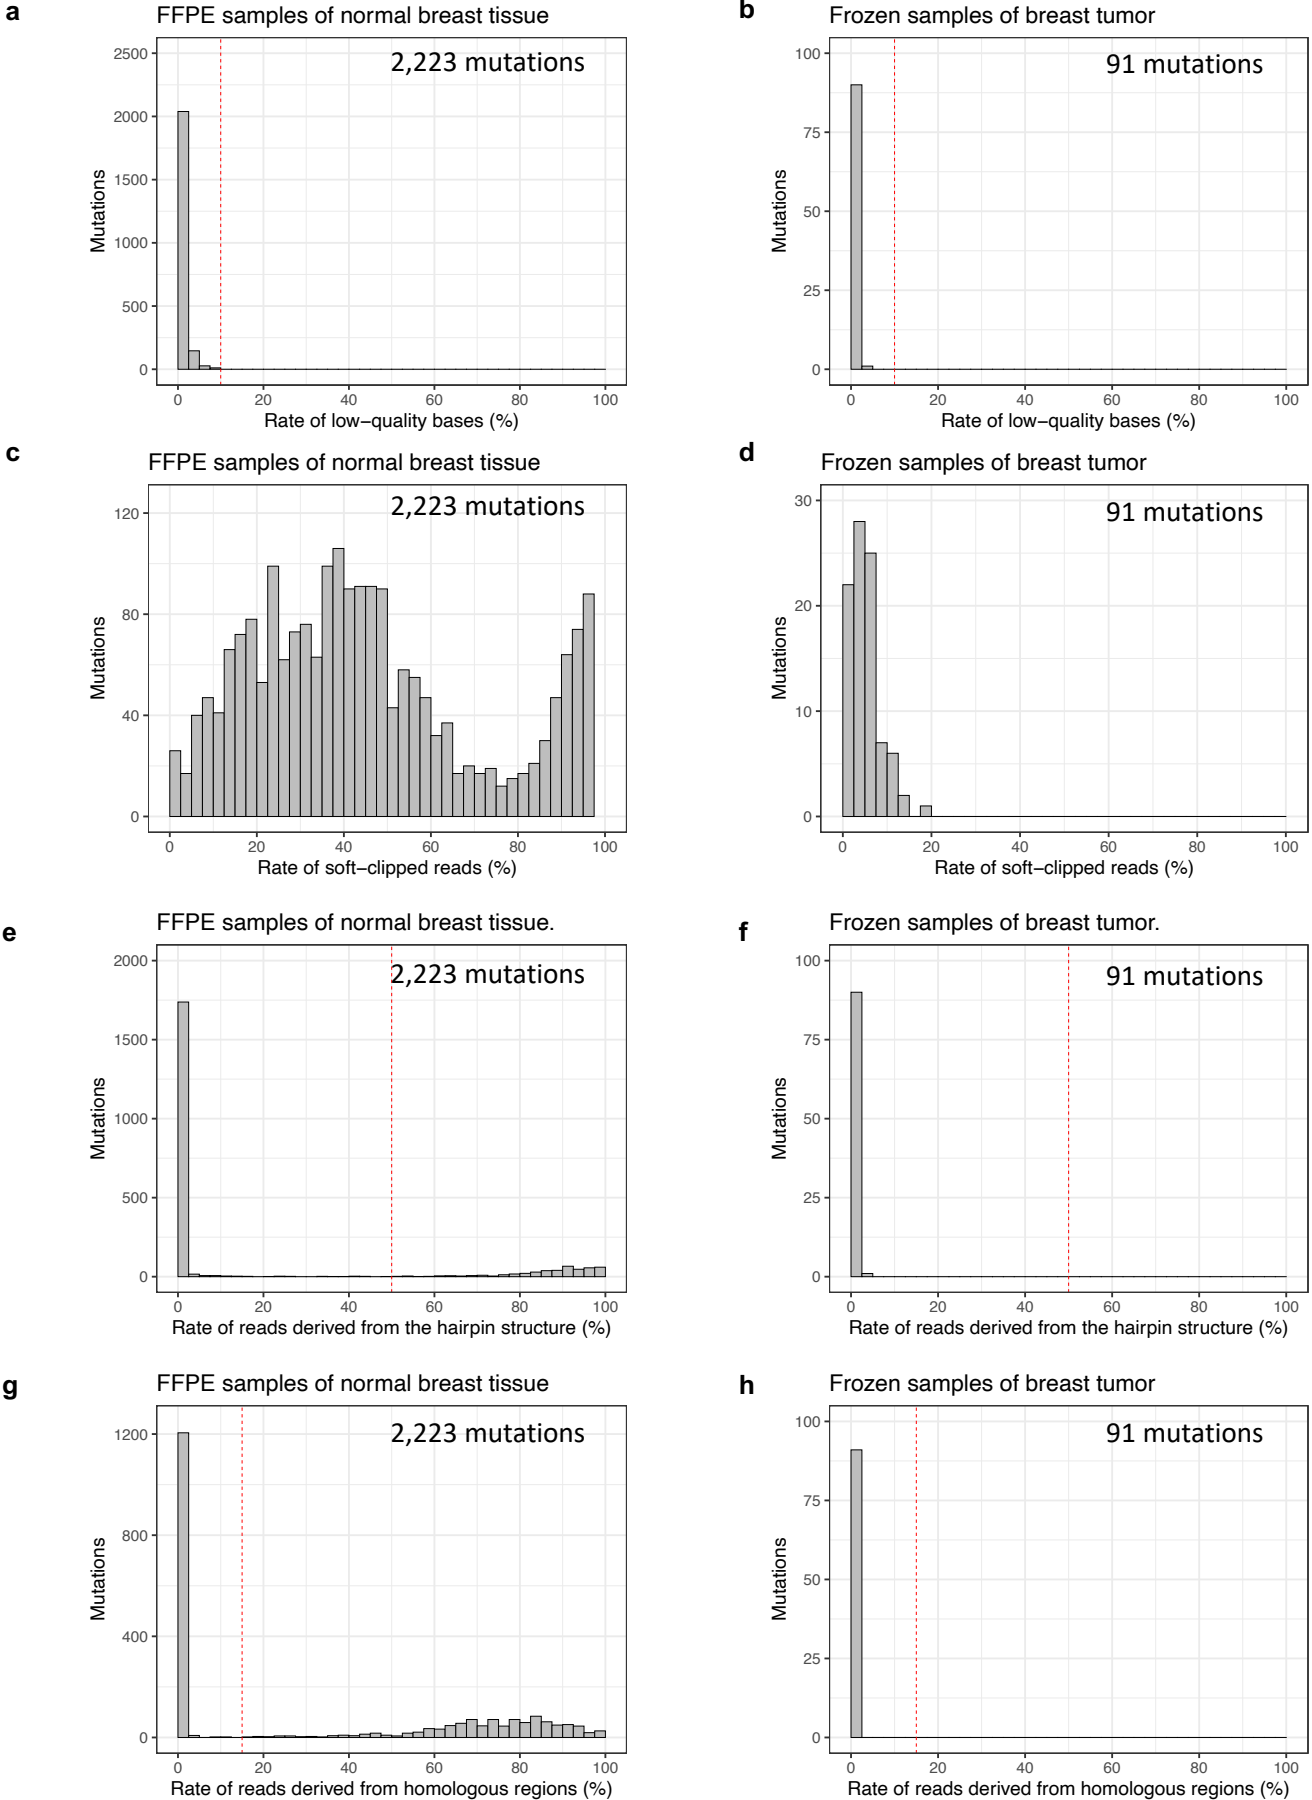

**a,b** The rate of low-quality bases in mutation-supporting reads in 190 FFPE normal breast tissue samples (**a**) and 23 frozen breast tumor samples (**b**). **c,d** The rate of soft-clipped reads in FFPE samples of normal breast tissue (**c**) and frozen samples of breast tumor (**d**). **e,f** The rate of reads derived from other homologous regions in FFPE samples of normal breast tissue (**e**) and frozen samples of breast tumor (**f**). **g,h** The rate of reads derived from the hairpin structure in FFPE samples of normal breast tissue (**g**) and frozen samples of breast tumor (**h**). Dotted red lines represent the thresholds.

### Supplementary Figure 3. The optimal hyperparameters of MicroSEC.

**a**

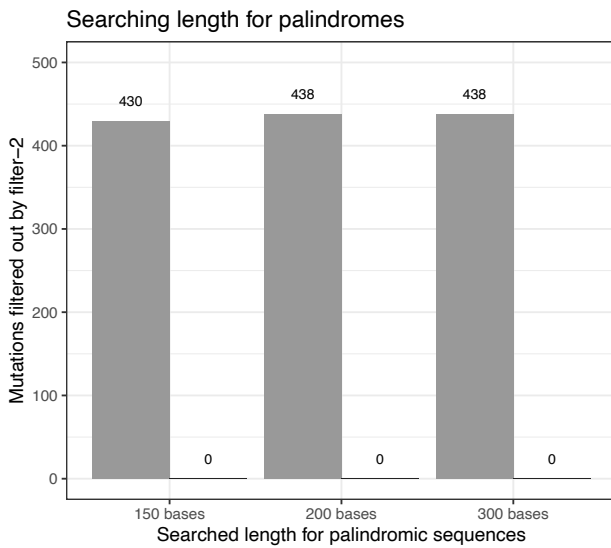

**b**

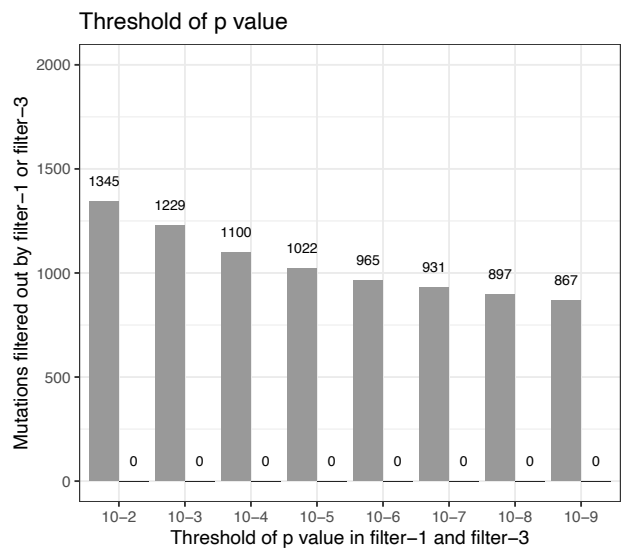

**c**

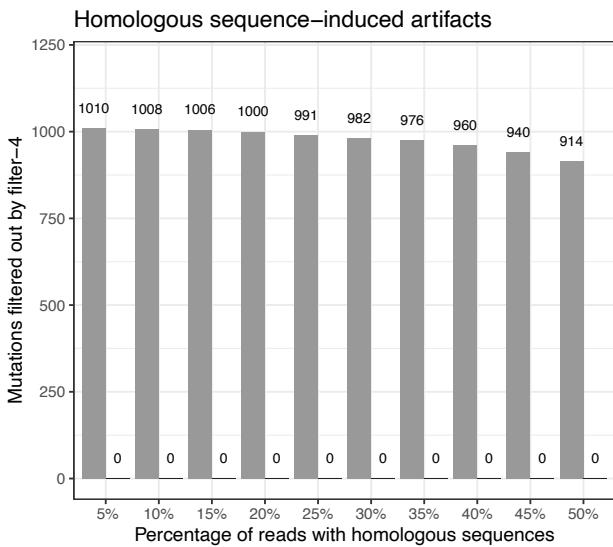

**d**

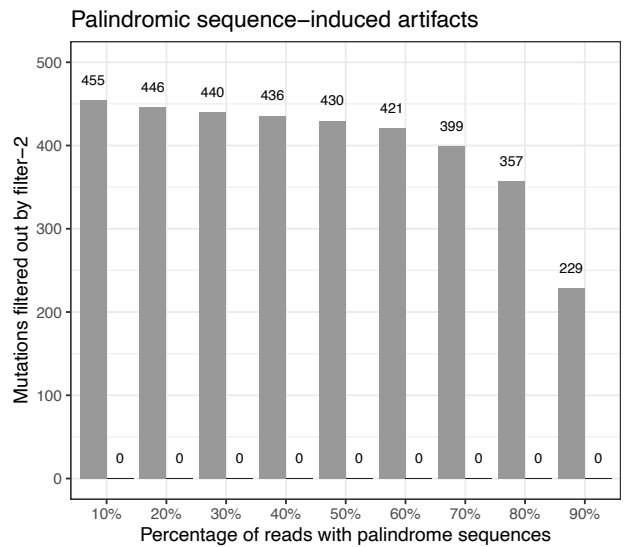

■ FFPE normal breast tissue

■ Frozen breast tumor

Detected artifacts with various hyperparameters in 190 FFPE normal breast tissue (gray) and 23 frozen breast tumor (black) samples. The base length to search palindromes (**a**), P-value thresholds for Filters 1 and 3 (**b**), Filter 2 (**c**), and Filter 4 (**d**) were varied and the number of artifacts detected was counted. FFPE, formalin-fixed and paraffin-embedded.

Supplementary Figure 4. Aligned reads in capture-based sequencing visualized by Integrative Genomics Viewer.

a *NFYA* p.Gln155Pro, chr6;41090226–41090227delinsCT

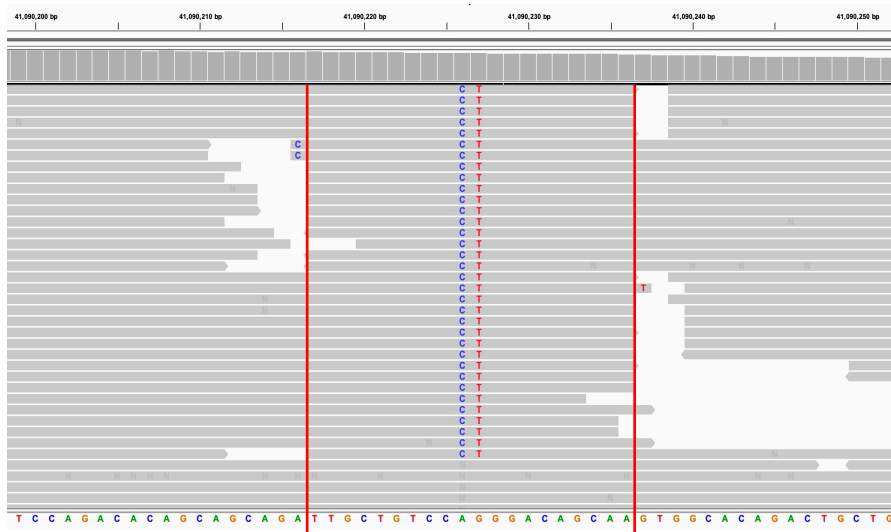

b *CENPA* p.Leu91Pro, chr2;26792817T>C

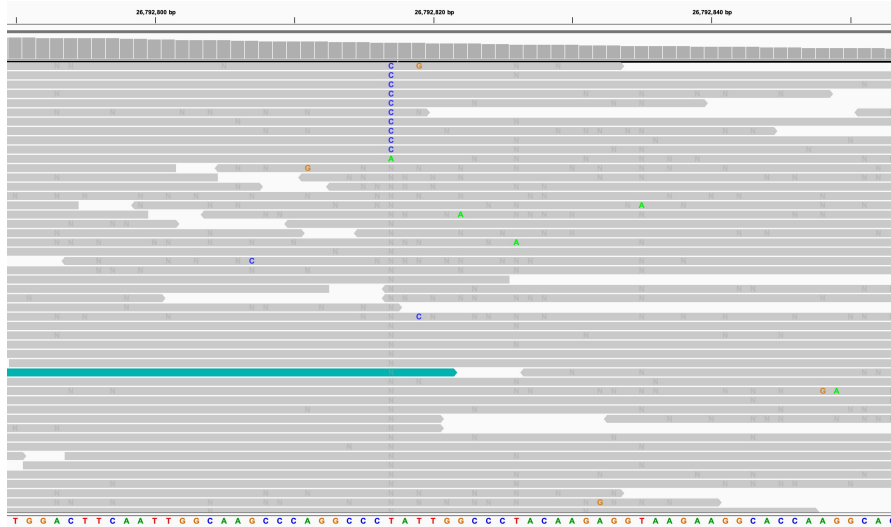

a AG-to-CT mutation in the *NFYA* gene is shown. All reads with mutations have a short supporting length from the mutated base to the end of the read (red line).

b T-to-C mutation in the *CENPA* gene is shown. Of the 954 reads mapped to the mutated base, 227 reads (24%) were of low quality and failed to call bases, 689 were wild-type (T), 47 were C, and one was A. Low quality bases are indicated by N. The mate-read of the green colored read is mapped to a different chromosome.

**Supplementary Figure 5. Limitation on the number of bases to map around a mutation.**

**a** Reference sequence

5' CGAGCACTGTGTCAGGCTGTGGCTGAGCCCCAAGGCCCAAACATGTGCC 3'

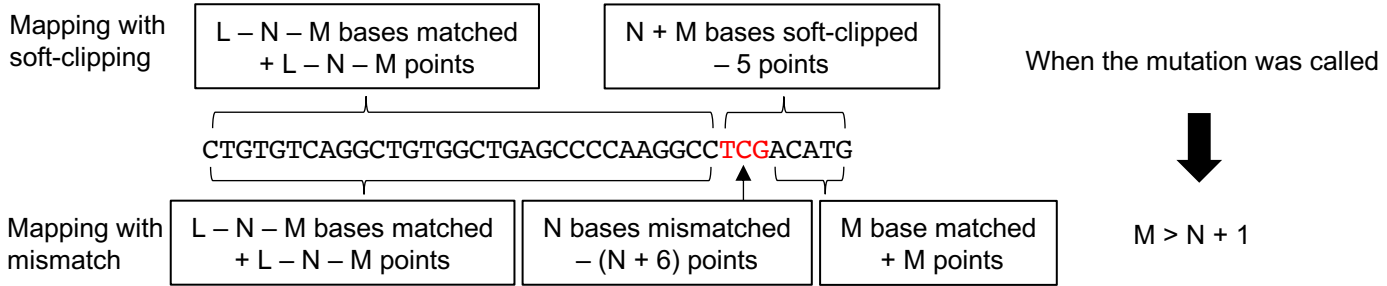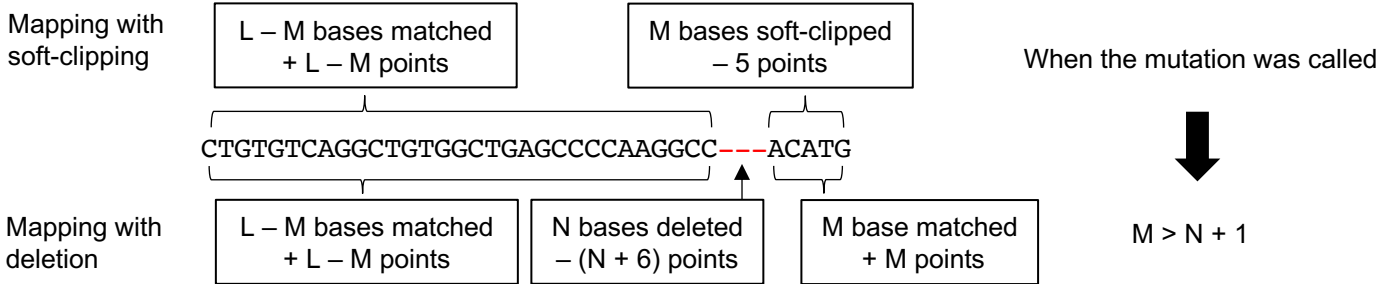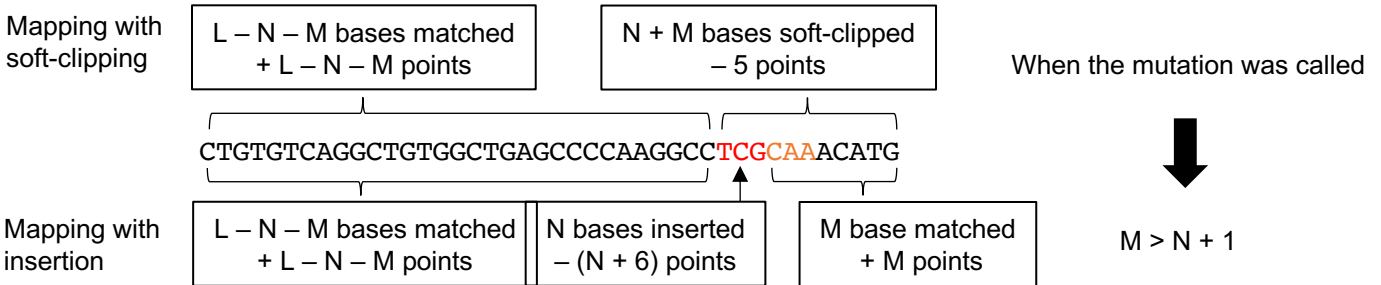

**b** Reference sequence

5' ATCTAGCTCGAGCACTCAACAACAACAACAACAACAACAACATATGTGCC 3'

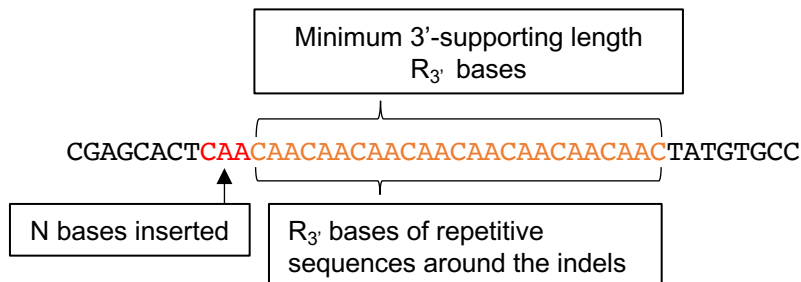

**a**  $L$  was considered to be the read length,  $N$  the number of bases mutated, and  $M$  the number of bases mapped outside the mutation. When Burrows-Wheeler Aligner were used as a mapper, the penalty due to an  $N$ -base mutation was  $N + 6$ , the soft-clipping penalty was 5, and the point for mapped  $M$  bases was  $M$ . When the mutation is called and not soft-clipped,  $M > N + 1$  must be satisfied regardless of the type of mutation.

**b** If the number of repetitions changes in a short tandem repeat, only reads containing all the repetitive sequences can support the presence of indel mutations.

**Supplementary Table 1. Filtered mutations with high variant allele frequency in FFPE samples.**

| Sample    | Chr | Position  | Ref | Alt   | VAF (%) | Mutation depth | Soft-clipped read | Hairpin-structure | Read length | Supporting length |     |         | Probability |    |         |
|-----------|-----|-----------|-----|-------|---------|----------------|-------------------|-------------------|-------------|-------------------|-----|---------|-------------|----|---------|
|           |     |           |     |       |         |                |                   |                   |             | 5'                | 3'  | Shorter | 5'          | 3' | Shorter |
| PT001_012 | 12  | 106255381 | G   | GTGAC | 55.4    | 655            | 648 (98.9%)       | 632 (96.5%)       | 150         | 145               | 125 | 10      | NA          | NA | 0       |
| PT102_009 | 12  | 106255382 | A   | T     | 70.2    | 539            | 477 (88.5%)       | 524 (97.2%)       | 150         | 148               | 136 | 36      | NA          | NA | NA      |
| PT107_002 | 12  | 106255382 | A   | T     | 74.3    | 927            | 818 (88.2%)       | 897 (96.8%)       | 150         | 149               | 136 | 37      | NA          | NA | NA      |
| PT107_009 | 12  | 106255382 | A   | T     | 53.4    | 385            | 341 (88.6%)       | 372 (96.6%)       | 150         | 147               | 139 | 38      | NA          | NA | NA      |
| PT107_010 | 12  | 106255382 | A   | T     | 75.9    | 960            | 889 (92.6%)       | 937 (97.6%)       | 150         | 149               | 136 | 37      | NA          | NA | NA      |
| PT112_008 | 12  | 106255382 | A   | T     | 65.4    | 464            | 411 (88.6%)       | 449 (96.8%)       | 124         | 123               | 121 | 32      | NA          | NA | NA      |
| PT107_006 | 12  | 106255382 | A   | T     | 56.7    | 393            | 345 (87.8%)       | 372 (94.7%)       | 124         | 123               | 110 | 34      | NA          | NA | NA      |

Chr, chromosome; Ref, reference sequence; Alt, altered sequence; VAF, variant allele frequency; NA, not assessed.

Probability is calculated only if the supporting length is < 80% of the read length.

**Supplementary Table 2. Pathogenic mutations in clinical FFPE samples filtered out by MicroSEC.**

| Sample   | Gene           | HGVS.c    | HGVS.p      | VAF (%) | Mutation depth | Soft-clipped read | Read length | Supporting length |     |         | Reads from distant region | MicroSEC |
|----------|----------------|-----------|-------------|---------|----------------|-------------------|-------------|-------------------|-----|---------|---------------------------|----------|
|          |                |           |             |         |                |                   |             | 5'                | 3'  | Shorter |                           |          |
| BRCA_001 | <i>RAD51B</i>  | c.1111C>T | p.Gln371*   | 12.2    | 41             | 26 (63.4%)        | 150         | 146               | 39  | 39      | 22 (53.7%)                | Filter 4 |
| COAD_001 | <i>PPP2R1A</i> | c.108delT | p.Leu36fs   | 13.4    | 18             | 5(27.8%)          | 150         | 46                | 141 | 46      | 10 (55.6%)                | Filter 4 |
| LUAD_016 | <i>FAM175A</i> | c.229C>T  | p.Arg77*    | 11.8    | 18             | 1 (6.3%)          | 151         | 141               | 68  | 68      | 12 (66.7%)                | Filter 4 |
| LUAD_016 | <i>RAD51B</i>  | c.1111C>T | p.Gln371*   | 10.9    | 100            | 65 (65.0%)        | 151         | 150               | 56  | 56      | 42 (42.0%)                | Filter 4 |
| LUAD_016 | <i>PPP2R1A</i> | c.108delT | p.Leu36fs   | 21.1    | 25             | 7 (28.0%)         | 151         | 63                | 145 | 63      | 15 (60.0%)                | Filter 4 |
| LUAD_021 | <i>TP53</i>    | c.1021T>G | p.Phe341Val | 8.8     | 74             | 4 (5.4%)          | 151         | 102               | 150 | 75      | 0 (0%)                    | Filter 3 |
| PDC_001  | <i>PPP2R1A</i> | c.108delT | p.Leu36fs   | 9.3     | 28             | 8 (28.6%)         | 151         | 62                | 144 | 62      | 15 (53.6%)                | Filter 4 |
| PDC_001  | <i>ZRSR2</i>   | c.283C>T  | p.Arg95*    | 6.0     | 13             | 8 (61.5%)         | 151         | 149               | 115 | 55      | 7 (53.8%)                 | Filter 4 |

Chr, chromosome; Ref, reference sequence; Alt, altered sequence; NA, not assessed.

Probability is calculated only if the supporting length is < 80% of the read length.



### Supplementary Table 3. MicroSEC filtering summary for whole exome sequencing.

|                                  | Matched primary cancer samples |                    |
|----------------------------------|--------------------------------|--------------------|
|                                  | Fresh frozen (N = 14)          | FFPE (N = 14)      |
| Total reads (in millions)        | 111.8 (45.2–145.9)             | 142.7 (83.6–235.4) |
| Mapped reads (%)                 | 93.3 (92.8–93.7)               | 93.4 (85.2–94.1)   |
| Unique reads (%)                 | 86.3 (83.8–93.0)               | 86.5 (73.5–92.2)   |
| Mean coverage                    | 199 (83–261)                   | 255 (134–394)      |
| Median insert size (base)        | 223 (197–238)                  | 173 (124–205)      |
| Somatic mutations                | 107.0 (81–196)                 | 118.2 (94–167)     |
| removed by                       |                                |                    |
| Filter 1                         | 0.1 (0–1)                      | 8.2 (0–47)         |
| Filter 2                         | 0 (0–0)                        | 3.9 (0–23)         |
| Filter 3                         | 0.1 (0–1)                      | 7.3 (0–42)         |
| Filter 4                         | 0.4 (0–3)                      | 1.2 (0–4)          |
| Any of Filter 1–4                | 0.6 (0–3)                      | 10.3 (0–55)        |
| Mutations passing the filter     | 106.4 (81–196)                 | 107.9 (85–138)     |
| Filtered rate (%)                | 0.5                            | 8.7                |
| CG-to-TG potential artifacts     | NA                             | 45.8 (14–56)       |
| Intra $\geq$ 10-base homopolymer | 0.0 (0–0)                      | 0 (0–0)            |
| Remaining mutations              | 106.4 (81–196)                 | 62.1 (45–89)       |

Data are shown as mean (range).

NA, not applicable; FFPE, formalin-fixed and paraffin-embedded.
