# Supplementary material for: MicroSEC filters sequence errors for formalin-fixed and paraffin-embedded samples
Source: PubMed Central journal article supplement (PMC8674242; doi:10.1038/s42003-021-02930-4), 2021-12-15
Supplement: 42003_2021_2930_MOESM3_ESM.pdf [file 42003_2021_2930_MOESM3_ESM.pdf]

## Description of Additional Supplementary Files

**File name:** Supplementary Data 1.

**Description:** List of mutations and oligos in this study. Source data underlying Fig. 7 and Supplementary Figs. 1 and 2.

**File name:** Supplementary Data 2.

**Description:** Source data underlying Figs. 4, 5b, 6a, and 6b.
